# Supplementary material for: Use of a Plasmodium vivax genetic barcode for genomic surveillance and parasite tracking in Sri Lanka
Source: PubMed Central journal article supplement (PMC7504840; doi:10.1186/s12936-020-03386-3), 2020-09-21
Supplement: 12936_2020_3386_MOESM3_ESM.pdf [file 12936_2020_3386_MOESM3_ESM.pdf]

| Province         | Year | Code             | 1 | 2 | 3 | 4 | 5 | 6 | 7 | 8 | 9 | 10 | 11 | 12 | 13 | 14 | 15 | 16 | 17 | 18 | 19 | 20 | 21 | 22 | 23 | 24 | 25 | 26 | 27 | 28 | 29 | 30 | 31 | 32 | 33 | 34 | 35 | 36 | 37 | 38 | 39 | 40 |   |   |   |
|------------------|------|------------------|---|---|---|---|---|---|---|---|---|----|----|----|----|----|----|----|----|----|----|----|----|----|----|----|----|----|----|----|----|----|----|----|----|----|----|----|----|----|----|----|---|---|---|
| Reference Allele |      |                  | C | C | A | A | C | A | T | G | T | G  | C  | C  | C  | A  | C  | T  | T  | T  | T  | C  | T  | C  | C  | T  | T  | C  | G  | G  | T  | G  | C  | C  | G  | C  | G  | T  | C  | G  | T  | C  | T | A | C |
| 99               | 99   | 1                | C | C | A | A | C | A | T | G | T | G  | C  | C  | C  | A  | C  | T  | T  | T  | T  | C  | T  | C  | C  | T  | T  | C  | A  | A  | C  | G  | T  | T  | A  | T  | G  | T  | C  | G  | T  | T  | G | C |   |
| 99               | 99   | 2                | C | C | A | A | T | G | T | G | T | C  | C  | C  | A  | C  | T  | X  | T  | T  | C  | T  | C  | C  | X  | T  | C  | A  | A  | T  | G  | T  | T  | A  | T  | G  | T  | C  | G  | T  | T  | G  | C |   |   |
| 99               | 99   | 3                | C | C | A | A | T | G | T | G | T | C  | C  | C  | A  | C  | T  | C  | G  | G  | T  | C  | T  | C  | C  | T  | C  | A  | A  | T  | G  | T  | T  | A  | T  | G  | T  | C  | G  | T  | T  | A  | C |   |   |
| 99               | 99   | 248              | C | C | A | A | T | G | T | G | T | C  | C  | C  | A  | C  | T  | T  | T  | T  | C  | T  | C  | C  | T  | C  | C  | A  | A  | T  | G  | T  | T  | A  | T  | G  | T  | C  | G  | T  | T  | G  | C |   |   |
| 99               | 99   | 520              | C | C | A | A | T | G | T | G | T | C  | C  | C  | A  | C  | T  | T  | T  | T  | C  | T  | C  | C  | T  | C  | C  | A  | A  | T  | G  | T  | T  | A  | T  | G  | T  | C  | G  | T  | T  | G  | C |   |   |
| 99               | 99   | 4793             | C | C | A | A | X | G | T | G | T | C  | C  | C  | A  | C  | T  | T  | T  | T  | C  | T  | C  | X  | T  | C  | T  | C  | A  | A  | T  | G  | T  | T  | A  | T  | G  | T  | C  | G  | X  | T  | G | C |   |
| 99               | 2005 | 12               | C | C | A | A | T | G | T | G | T | C  | C  | C  | A  | C  | T  | C  | T  | T  | C  | T  | C  | C  | T  | C  | C  | A  | A  | T  | G  | T  | T  | A  | T  | G  | T  | C  | G  | T  | T  | G  | C |   |   |
| 99               | 2005 | 15               | C | C | A | A | T | G | T | G | X | T  | C  | C  | C  | A  | C  | T  | T  | T  | T  | C  | T  | C  | C  | T  | C  | A  | A  | T  | G  | T  | T  | A  | T  | G  | T  | C  | G  | T  | T  | G  | C |   |   |
| 99               | 2007 | 23               | C | C | A | A | T | G | T | G | T | C  | C  | C  | A  | C  | T  | X  | T  | T  | C  | T  | C  | C  | T  | C  | C  | A  | A  | T  | G  | T  | T  | A  | X  | G  | T  | C  | G  | T  | T  | G  | C |   |   |
| 99               | 2007 | 24               | C | C | A | A | T | G | T | G | T | C  | C  | C  | A  | C  | T  | T  | T  | T  | C  | T  | C  | C  | T  | C  | C  | A  | A  | T  | G  | T  | T  | A  | T  | G  | T  | C  | G  | T  | T  | G  | C |   |   |
| 99               | 2011 | MR4783           | C | C | A | A | T | G | T | G | T | C  | C  | C  | A  | C  | T  | T  | T  | T  | C  | T  | C  | C  | T  | C  | C  | A  | A  | T  | G  | T  | T  | A  | T  | G  | T  | C  | G  | T  | T  | G  | C |   |   |
| 99               | 2011 | MR4785           | C | C | G | G | C | A | C | A | T | C  | T  | T  | A  | T  | C  | C  | G  | G  | X  | C  | C  | C  | C  | C  | C  | A  | A  | T  | G  | T  | T  | A  | T  | A  | C  | C  | G  | T  | T  | G  | C |   |   |
| Eastern          | 2006 | 22               | C | C | A | A | T | G | T | G | T | C  | C  | C  | A  | C  | T  | T  | T  | T  | C  | T  | C  | C  | T  | C  | A  | A  | T  | G  | T  | T  | A  | T  | G  | T  | C  | G  | T  | T  | G  | C  |   |   |   |
| Eastern          | 2007 | 25               | C | C | A | A | T | G | T | G | T | C  | C  | C  | A  | C  | T  | T  | T  | T  | C  | T  | C  | C  | T  | C  | A  | A  | T  | G  | T  | T  | A  | T  | A  | T  | C  | G  | T  | T  | G  | C  |   |   |   |
| Eastern          | 2007 | 34               | N | C | A | G | T | A | C | G | C | T  | C  | C  | A  | C  | X  | C  | G  | G  | C  | T  | C  | X  | C  | A  | N  | A  | T  | G  | T  | C  | G  | T  | A  | C  | X  | G  | T  | T  | N  | C  |   |   |   |
| Eastern          | 2007 | G115             | C | C | A | G | T | A | X | G | C | T  | C  | X  | A  | C  | T  | C  | G  | G  | T  | C  | C  | C  | C  | A  | A  | A  | T  | G  | T  | C  | G  | T  | G  | T  | X  | G  | T  | T  | A  | C  |   |   |   |
| Eastern          | 2007 | T1               | C | C | A | A | T | A | T | G | T | C  | C  | C  | A  | C  | X  | X  | T  | T  | T  | C  | C  | T  | C  | C  | A  | A  | T  | G  | T  | T  | X  | X  | G  | T  | C  | G  | T  | T  | G  | C  |   |   |   |
| Eastern          | 2007 | S2 pilot screen  | N | C | A | G | T | G | N | A | T | N  | C  | T  | A  | T  | T  | N  | G  | G  | N  | T  | T  | C  | T  | C  | G  | G  | T  | G  | N  | N  | A  | C  | A  | T  | C  | G  | T  | C  | G  | N  |   |   |   |
| Eastern          | 2007 | S5 pilot screen  | C | T | N | G | T | A | T | A | T | C  | N  | N  | G  | T  | T  | N  | N  | N  | C  | C  | T  | C  | N  | N  | N  | N  | T  | G  | N  | N  | N  | N  | G  | N  | C  | G  | T  | N  | N  | C  |   |   |   |
| Eastern          | 2007 | S6 pilot screen  | C | T | G | G | N | A | C | A | T | C  | C  | G  | T  | T  | T  | G  | C  | T  | C  | C  | T  | C  | C  | C  | A  | A  | T  | G  | T  | T  | G  | C  | A  | N  | C  | G  | T  | T  | G  | C  |   |   |   |
| Eastern          | 2007 | S7 pilot screen  | C | T | A | G | C | G | C | A | C | T  | C  | T  | A  | C  | T  | T  | T  | G  | T  | T  | C  | C  | C  | A  | A  | G  | C  | A  | C  | C  | G  | C  | G  | C  | C  | G  | T  | T  | G  | C  |   |   |   |
| Eastern          | 2007 | S8 pilot screen  | C | T | G | G | T | G | C | A | T | T  | C  | C  | A  | C  | T  | T  | C  | T  | G  | C  | T  | C  | C  | C  | C  | A  | A  | T  | G  | N  | T  | G  | C  | A  | C  | C  | G  | T  | T  | G  | C |   |   |
| Eastern          | 2007 | S9 pilot screen  | C | N | N | N | N | N | A | T | N | N  | N  | N  | N  | N  | T  | N  | T  | T  | C  | N  | T  | C  | N  | T  | N  | N  | N  | A  | N  | T  | N  | N  | T  | N  | C  | N  | N  | C  | G  | T  | T | N | C |
| Eastern          | 2007 | S10 pilot screen | C | C | A | A | C | A | C | A | C | T  | T  | N  | G  | C  | T  | T  | G  | G  | C  | T  | T  | T  | C  | A  | A  | G  | C  | A  | N  | T  | A  | C  | G  | N  | C  | G  | T  | T  | G  | C  |   |   |   |
| Eastern          | 2007 | S12 pilot screen | N | C | G | G | T | A | C | A | T | T  | C  | C  | N  | C  | N  | C  | G  | G  | T  | T  | C  | C  | C  | C  | A  | A  | T  | G  | N  | T  | G  | T  | G  | C  | N  | C  | G  | T  | T  | N  | C |   |   |
| Eastern          | 2007 | S13 pilot screen | C | C | G | G | T | A | C | A | T | C  | C  | C  | A  | C  | T  | T  | C  | G  | G  | N  | T  | T  | C  | C  | C  | A  | A  | T  | G  | T  | T  | G  | T  | G  | C  | N  | C  | G  | N  | C  | A | C |   |
| Eastern          | 2007 | S14 pilot screen | C | C | A | A | T | A | C | G | T | N  | C  | T  | G  | C  | T  | N  | T  | G  | T  | C  | C  | N  | T  | C  | A  | A  | G  | T  | G  | T  | T  | G  | T  | G  | N  | C  | G  | T  | T  | A  | C |   |   |
| Eastern          | 2007 | S16 pilot screen | C | C | G | A | T | G | C | G | C | T  | C  | T  | G  | C  | T  | T  | T  | G  | T  | C  | C  | T  | T  | C  | A  | G  | C  | G  | T  | T  | G  | T  | G  | C  | C  | G  | T  | T  | A  | C  |   |   |   |
| Eastern          | 2007 | S17 pilot screen | C | C | G | G | T | A | T | G | C | N  | T  | C  | A  | C  | T  | C  | G  | G  | T  | C  | C  | C  | C  | A  | A  | G  | C  | G  | T  | C  | G  | C  | A  | C  | C  | G  | T  | T  | G  | C  |   |   |   |
| Eastern          | 2010 | 90               | C | C | A | A | T | G | T | G | C | T  | C  | C  | A  | C  | T  | C  | G  | G  | T  | T  | C  | T  | T  | C  | A  | A  | T  | G  | T  | C  | G  | T  | G  | C  | A  | G  | T  | T  | A  | C  |   |   |   |
| Eastern          | 2010 | T2               | C | C | A | A | T | G | T | G | T | C  | C  | C  | A  | C  | T  | T  | T  | T  | C  | C  | T  | C  | C  | A  | A  | T  | G  | T  | T  | A  | T  | G  | T  | C  | G  | T  | T  | G  | C  |    |   |   |   |
| Eastern          | 2010 | T4               | C | C | A | A | T | G | T | G | T | C  | C  | C  | A  | C  | T  | T  | T  | T  | T  | C  | C  | T  | C  | C  | A  | A  | T  | G  | T  | T  | A  | T  | A  | T  | C  | C  | G  | T  | T  | G  | C |   |   |
| Eastern          | 2010 | T7               | N | C | A | N | T | G | N | G | N | N  | C  | C  | A  | C  | T  | N  | N  | T  | C  | T  | C  | T  | C  | C  | A  | A  | T  | G  | T  | N  | N  | T  | G  | N  | C  | G  | T  | T  | G  | C  |   |   |   |
| Eastern          | 2010 | S3 pilot screen  | C | T | A | G | C | G | C | A | T | C  | C  | T  | G  | T  | T  | T  | G  | T  | T  | C  | T  | C  | C  | C  | A  | A  | G  | T  | G  | C  | T  | G  | C  | A  | T  | C  | G  | T  | T  | A  | C |   |   |
| North Western    | 2005 | 5                | C | C | A | A | T | G | C | G | T | T  | C  | C  | A  | C  | T  | C  | G  | G  | T  | T  | C  | T  | T  | C  | A  | A  | G  | T  | G  | T  | C  | G  | T  | G  | C  | C  | G  | T  | T  | A  | C |   |   |
| North Western    | 2005 | 6                | C | C | A | A | T | G | C | G | C | T  | C  | C  | A  | C  | T  | C  | G  | G  | T  | T  | C  | T  | T  | C  | A  | A  | T  | G  | T  | C  | G  | T  | G  | C  | C  | G  | T  | T  | A  | C  |   |   |   |
| North Western    | 2005 | 7                | C | C | A | A | T | G | C | G | C | T  | C  | C  | A  | C  | T  | C  | G  | G  | X  | T  | C  | T  | T  | C  | A  | A  | T  | G  | T  | C  | G  | T  | G  | C  | C  | G  | T  | T  | A  | C  |   |   |   |
| North Western    | 2005 | 8                | C | C | X | A | T | G | T | G | T | C  | C  | X  | C  | X  | T  | T  | T  | C  | T  | C  | X  | T  | C  | A  | A  | A  | T  | X  | T  | T  | A  | T  | G  | T  | C  | G  | T  | T  | G  | C  |   |   |   |
| North Western    | 2005 | 9                | C | C | A | A | T | G | T | N | T | C  | C  | C  | A  | N  | T  | T  | T  | T  | C  | N  | C  | C  | T  | C  | A  | A  | T  | G  | T  | T  | A  | T  | A  | T  | C  | G  | T  | T  | G  | X  |   |   |   |
| North Western    | 2005 | 16               | C | C | N | A | T | N | T | G | T | C  | C  | N  | A  | N  | T  | N  | N  | N  | C  | N  | C  | T  | C  | C  | A  | A  | T  | G  | T  | T  | A  | T  | A  | T  | C  | G  | T  | X  | G  | C  |   |   |   |
| Southern         | 99   | G15              | C | C | A | N | X | A | C | G | T | T  | C  | C  | A  | T  | T  | C  | N  | G  | X  | T  | C  | C  | C  | A  | A  | A  | T  | G  | T  | C  | X  | T  | N  | T  | C  | G  | T  | T  | A  | X  |   |   |   |
| Southern         | 2009 | G23              | C | C | A | A | T | G | C | G | C | T  | C  | C  | A  | A  | T  | T  | C  | G  | G  | T  | T  | C  | T  | T  | C  | A  | A  | T  | G  | T  | C  | G  | T  | G  | T  | C  | G  | T  | T  | G  | A |   |   |
| Southern         | 2009 | S1 pilot screen  | C | T | G | G | T | A | C | G | N | T  | C  | T  | A  | A  | T  | T  | G  | G  | T  | T  | C  | C  | T  | C  | A  | A  | T  | G  | T  | T  | A  | T  | G  | N  | C  | G  | T  | T  | G  | A  |   |   |   |
| Southern         | 2009 | S11 pilot screen | T | C | A | G | C | A | C | N | C | C  | C  | A  | N  | T  | N  | G  | G  | N  | T  | T  | C  | C  | C  | A  | A  | A  | T  | G  | N  | T  | G  | T  | G  | C  | C  | G  | C  | C  | A  | C  |   |   |   |
| Southern         | 2010 | 95               | C | C | A | A | C | A | T | G | T | T  | C  | C  | A  | C  | T  | C  | G  | G  | C  | T  | C  | C  | C  | A  | A  | T  | G  | T  | T  | G  | T  | A  | C  | C  | G  | C  | T  | G  | C  |    |   |   |   |
| Southern         | 2010 | MR4775           | C | T | G | N | N | N | A | C | N | T  | T  | A  | N  | C  | C  | T  | N  | C  | C  | X  | N  | N  | N  | N  | T  | N  | T  | T  | A  | N  | A  | T  | X  | G  | T  | T  | N  | C  |    |    |   |   |   |
| Southern         | 2010 | 620              | C | C | A | A | T | G | T | G | T | C  | C  | C  | A  | C  | T  | T  | T  | T  | C  | T  | C  | C  | T  | C  | A  | A  | T  | G  | T  | T  | A  | T  | G  | T  | C  | G  | T  | T  | G  | C  |   |   |   |
| Southern         | 2010 | S18 pilot screen | C | C | A | A | T | A | T | G | C | T  | T  | A  | C  | T  | C  | G  | G  | C  | T  | T  | T  | T  | C  | G  | G  | T  | G  | C  | T  | A  | C  | A  | C  | C  | G  | T  | C  | G  | C  |    |   |   |   |
| Southern         | 2010 | S19 pilot screen | N | T | G | A | T | A | N | N | N | T  | T  | N  | A  | C  | T  | C  | T  | G  | T  | T  | T  | C  | C  | A  | A  | G  | T  | G  | N  | T  | A  | T  | G  | C  | N  | G  | T  | C  | G  | A  |   |   |   |
| Uva              | 2009 | S15 pilot screen | C | C | N | A | T | A | C | G | C | N  | C  | T  | G  | C  | T  | N  | T  | T  | T  | C  | T  | T  | T  | C  | A  | A  | G  | T  | G  | T  | C  | G  | T  | G  | C  | C  | G  | T  | T  | A  | A |   |   |
